# Supplementary material for: Simultaneous analysis of cardiolipin and lipid A from Helicobacter pylori by matrix-assisted laser desorption/ionization time-of-flight mass spectrometry
Source: Royal Society of Chemistry journal article supplement (doi:10.1039/c2mb05475b), 2012-01-20
Supplement: c2mb05475b.pdf [file c2mb05475b.pdf]

## Supporting information

### **Simultaneous analysis of cardiolipin and lipid A from *Helicobacter pylori* by matrix-assisted laser desorption/ionization time-of-flight mass spectrometry**

Ping Zhou<sup>¶a,b</sup>, Rui Hu<sup>¶a,c</sup>, Vandana Chandan<sup>a</sup>, Rhonda KuoLee<sup>a</sup>, Xin Liu<sup>c</sup>, Wangxue Chen<sup>a</sup>, Bifeng Liu<sup>c</sup>, Eleonora Altman<sup>\*a</sup>, Jianjun Li<sup>\*a</sup>

<sup>a</sup> Institute for Biological Sciences, National Research Council Canada, Ottawa, Ontario, Canada, K1A 0R6

<sup>b</sup> College of Chemistry and Molecular Sciences, Wuhan University, Wuhan, P. R. China.

<sup>c</sup> College of Life Science and Technology, Huazhong University of Science and Technology

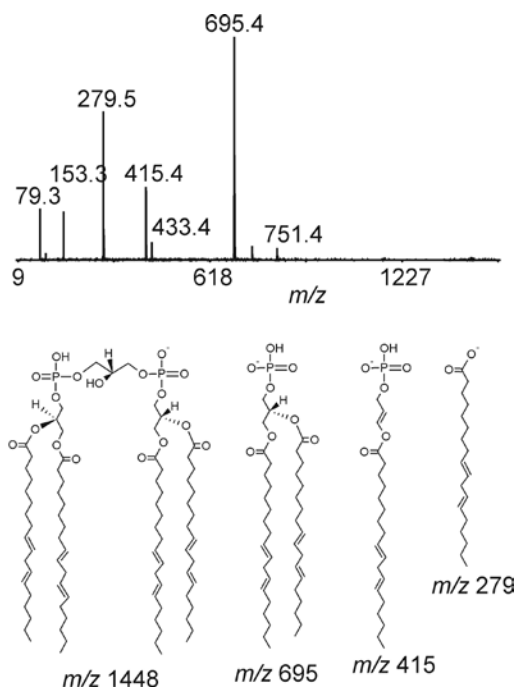

Figure S1. MS/MS spectrum produced by  $m/z$  1448.

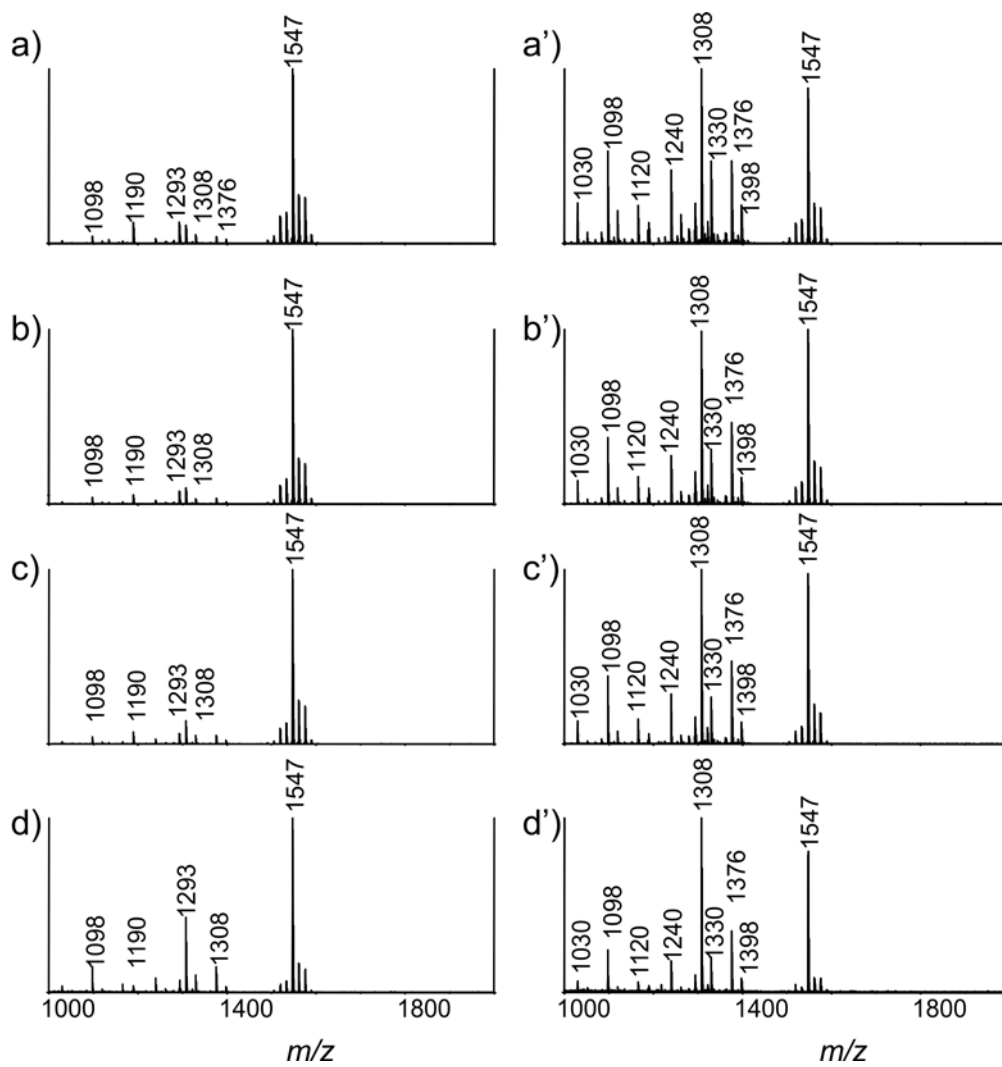

Figure S2. The effect of ammonium acetate on the extraction conditions of CL from *H. pylori*, strain NCTC 11637 (ATCC 43504), with different amounts of dried cells. (a) 250 µg, no AA, (b) 100 µg, (c) 50 µg and (d) 10 µg of dried cells. (a') 250 µg, with AA, (b') 100 µg, (c') 50 µg and (d') 10 µg of dried cells.

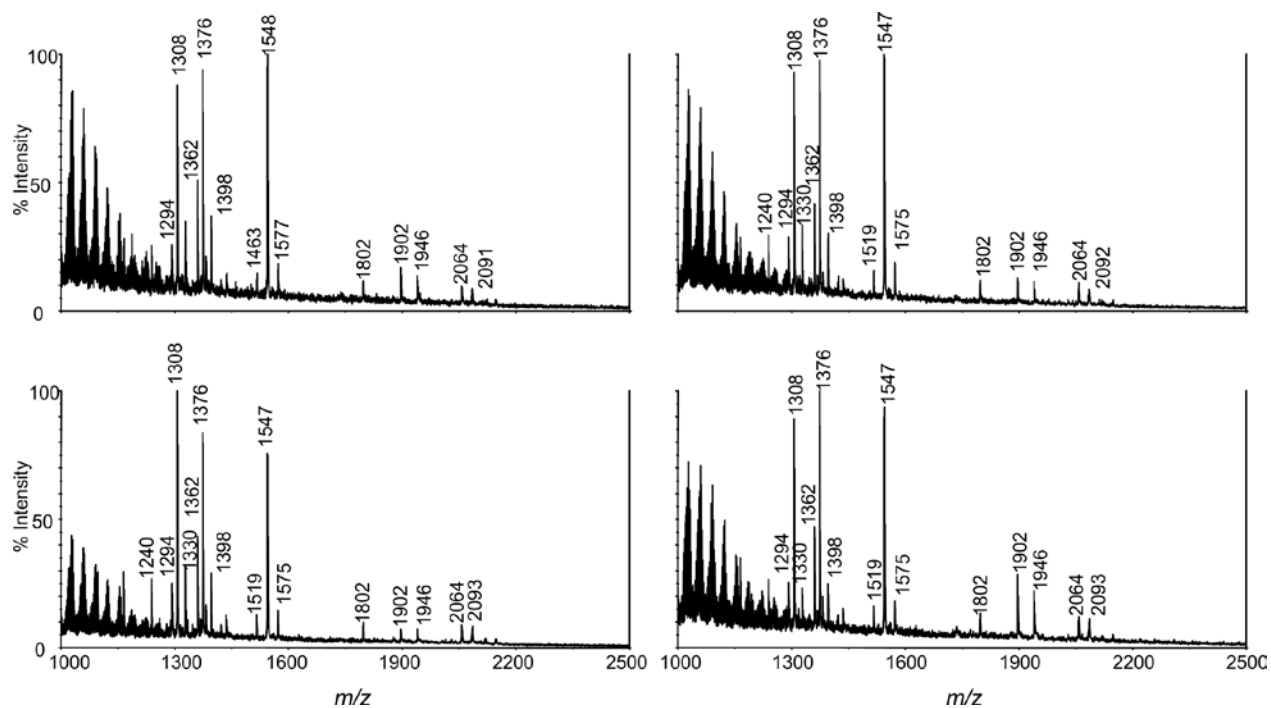

Figure S3. MALDI analysis of single colonies of *ex vivo* *H. pylori* strain NCTC 11637 (ATCC 43504) following 12 week colonization experiments in Mongolian gerbils. The bacteria were collected from *ex vivo* source and cultured in the presence of an uninfected gerbil stomach tissue.

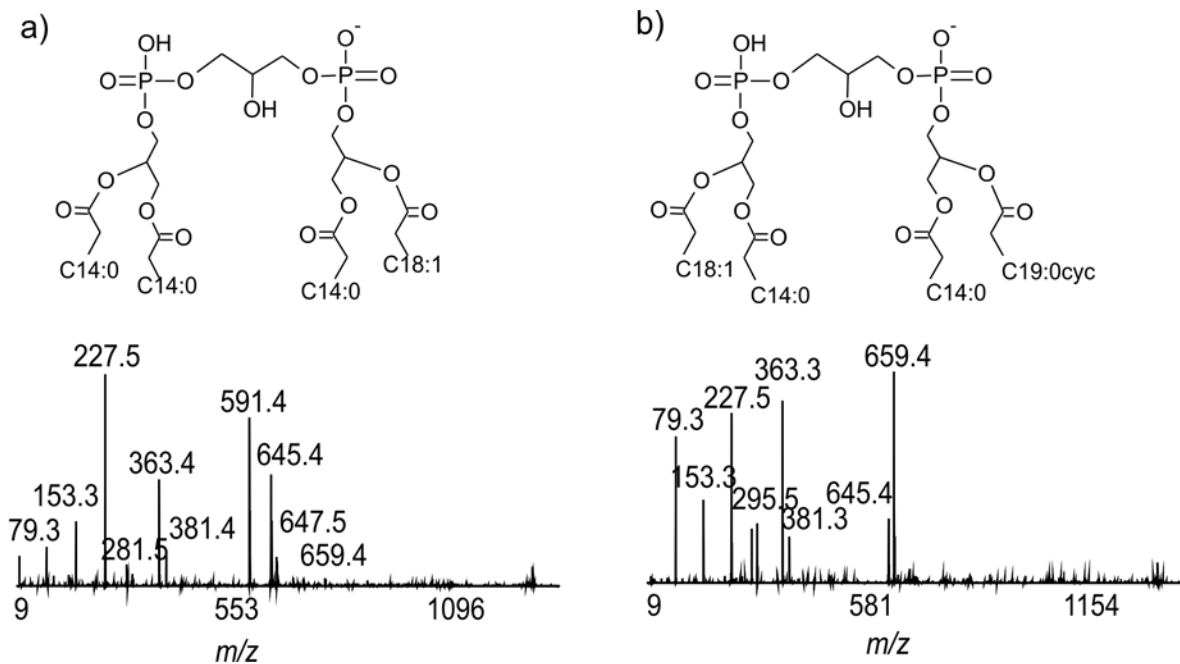

Figure S4. MS/MS of  $m/z$  1294 and 1362 confirmed the structures of main CL detected in *H. pylori ex vivo* samples.

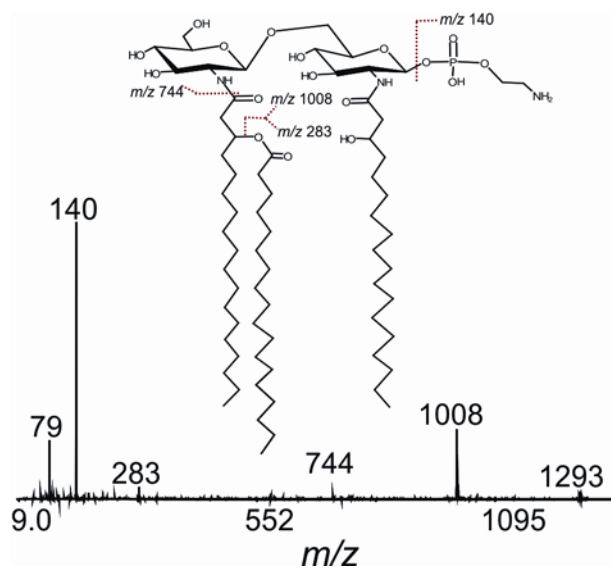

Figure S5. MS/MS of  $m/z$  1293 revealed that the species can be assigned as a lipid A.
